# Supplementary material for: Highly transparent and flexible polyaniline mesh sensor for chemiresistive sensing of ammonia gas
Source: Royal Society of Chemistry journal article supplement (doi:10.1039/c7ra13516e), 2018-01-01
Supplement: c7ra13516e1.pdf [file c7ra13516e1.pdf]

**Electronic Supplementary Information for**

**Highly Transparent and Flexible Polyaniline  
Mesh Sensor for Chemiresistive Sensing of  
Ammonia Gas**

Jingxuan Cai<sup>a,b</sup>, Cuiping Zhang<sup>a,b</sup>, Arshad Khan<sup>a</sup>, Chuwei Liang<sup>a,b</sup> and Wen-Di Li<sup>a,b</sup>

<sup>a</sup>*Department of Mechanical Engineering, The University of Hong Kong, Pokfulam, Hong Kong,  
China*

<sup>b</sup>*HKU-Zhejiang Institute of Research and Innovation (HKU-ZIRI), Hangzhou 311300, Zhejiang,  
China.*

Contact e-mail: [liwd@hku.hk](mailto:liwd@hku.hk)

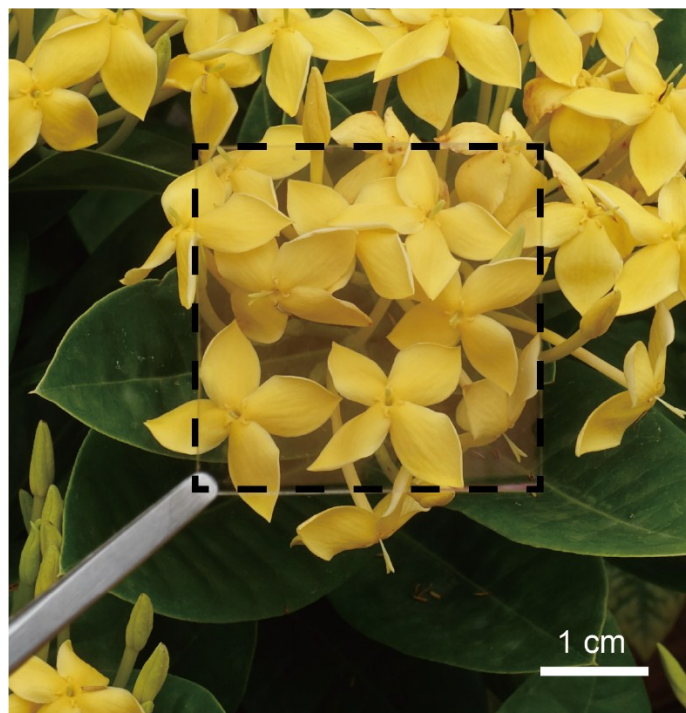

**Figure S1.** Photograph of the original Cu mesh on a cyclic olefin copolymer (COC) film; the sheet resistance and transparency of the Cu mesh were  $0.3 \, \Omega/\square$  and 72%, respectively.

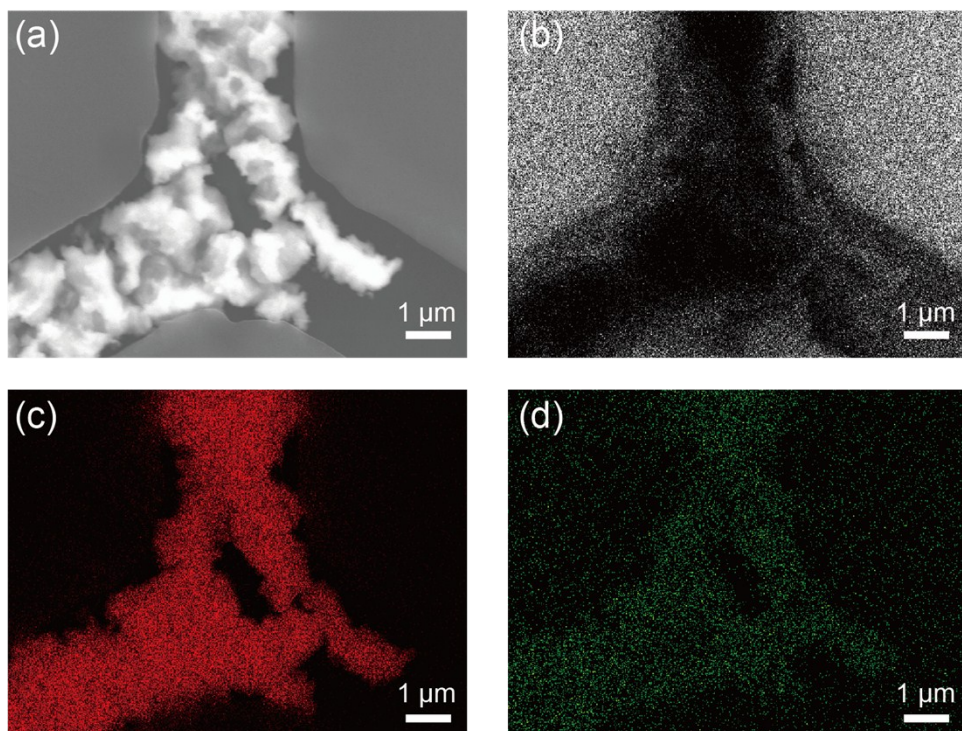

**Figure S2.** SEM-EDS analysis of a partially etched Cu mesh after 3 min in the aniline polymerization solution on COC film. (a) SEM image; elemental mapping: (b) carbon, (c) copper, and (d) chlorine.

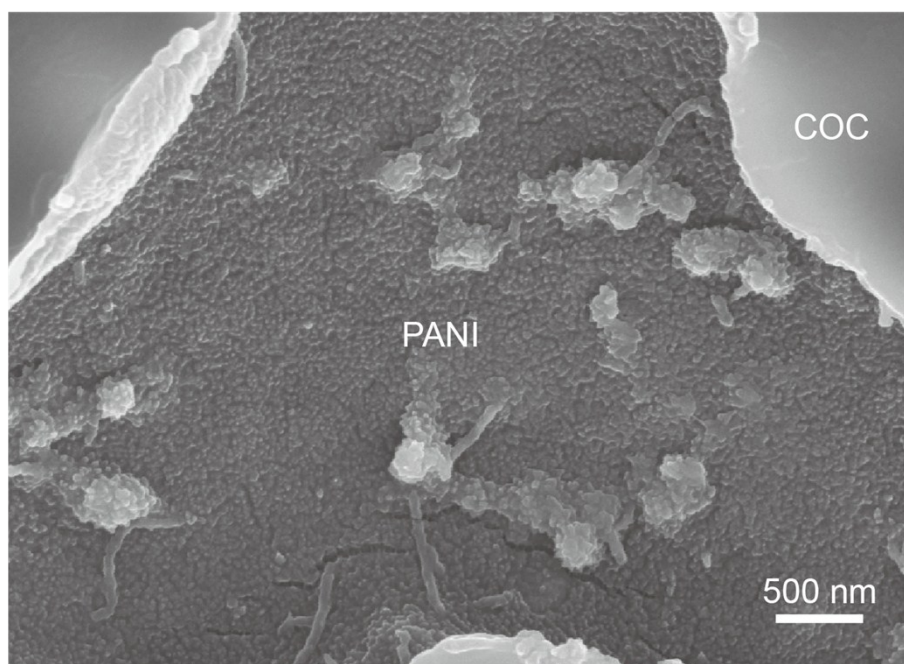

**Figure S3.** SEM micrograph of the PANI nanostructures on the PANI mesh after 20 min in the aniline polymerization solution.

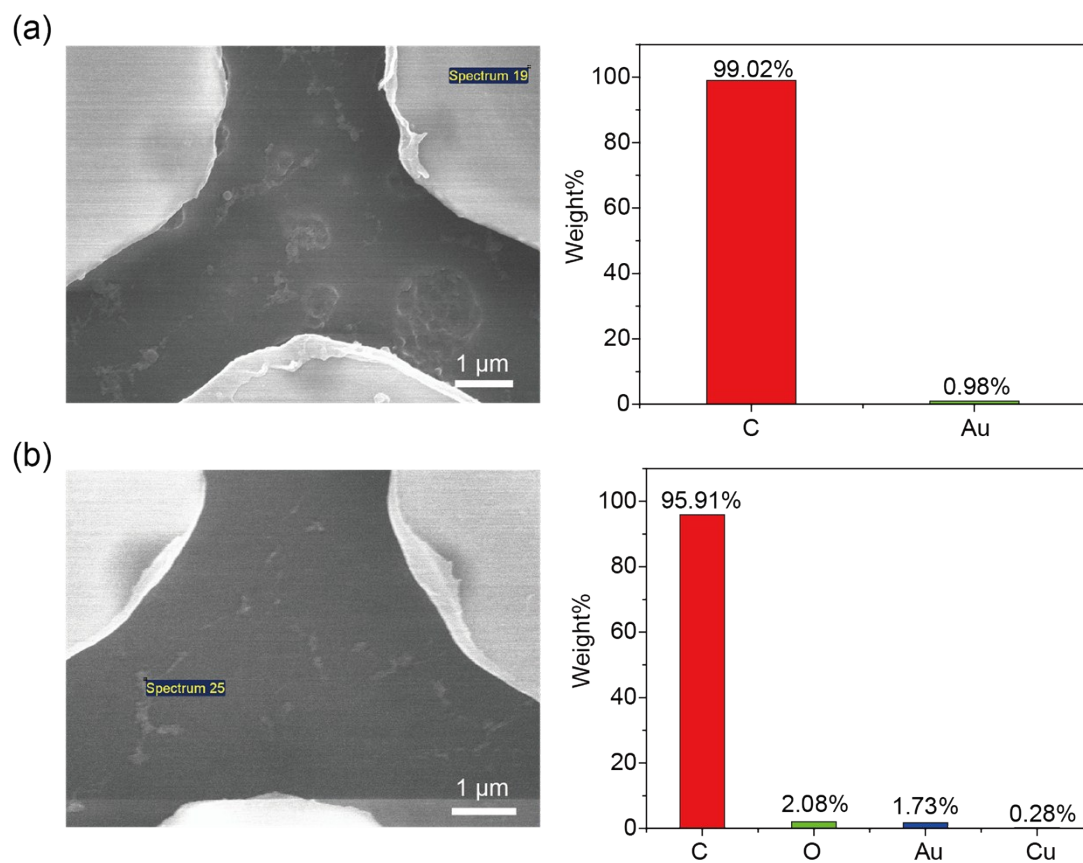

**Figure S4.** SEM-EDS analysis of a PANI mesh after 20 min in the aniline polymerization solution on COC film. (a) Analysis on the uncovered COC area, and (b) on PANI mesh.

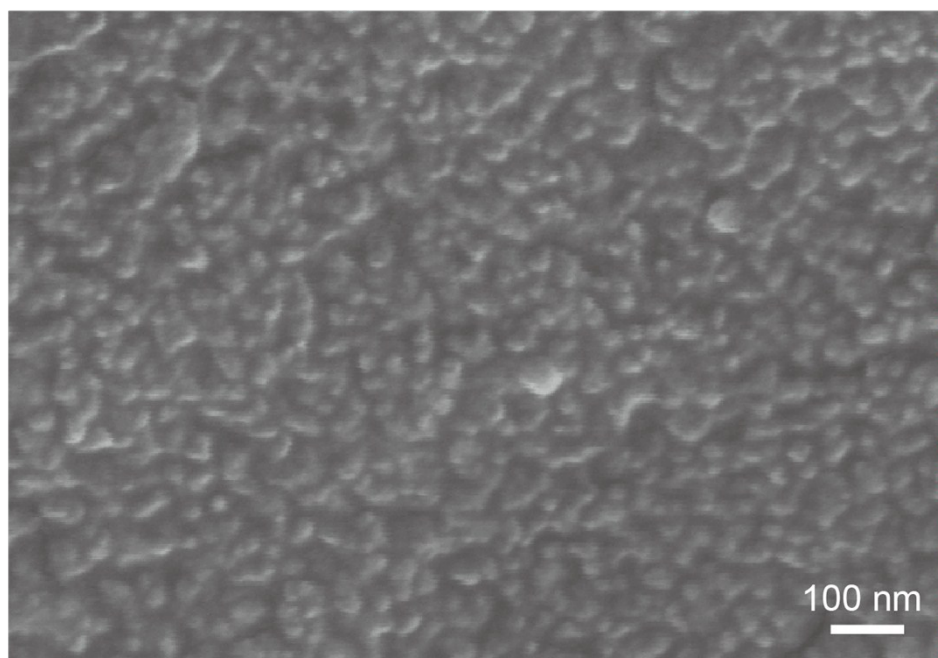

**Figure S5.** Zoom-in SEM micrograph of the PANI nanoparticles on the PANI mesh after 20 min in the aniline polymerization solution.

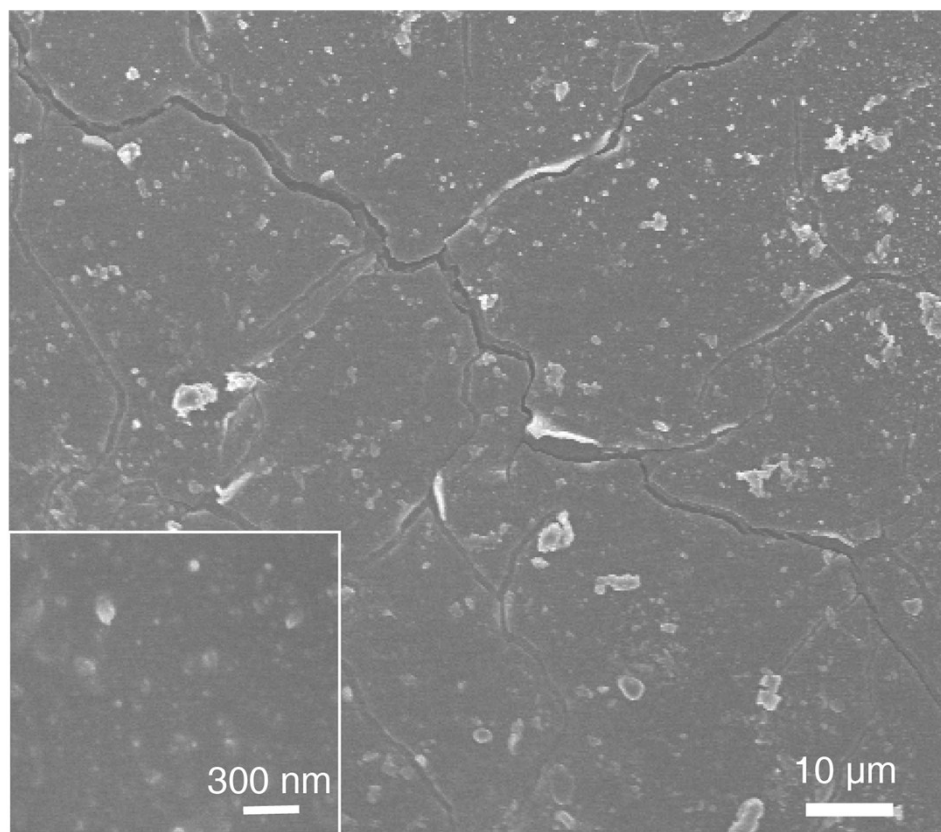

**Figure S6.** SEM micrograph of a continuous PANI film fabricated by immersing an unmodified COC film in the aniline polymerizing solution for 20 min. (inset) Zoom-in SEM micrograph showing the morphology on the continuous PANI film.



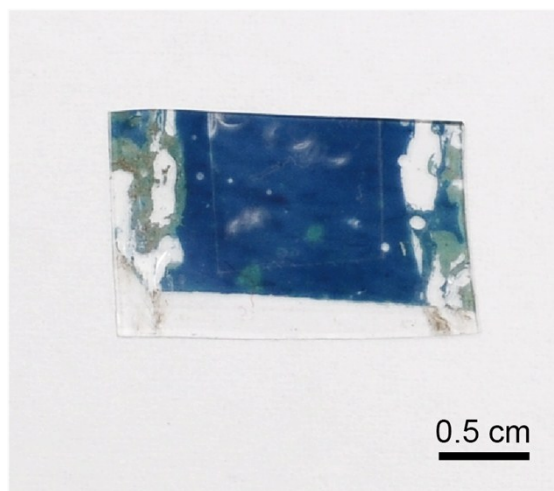

**Figure S7.** Photograph of a continuous PANI film fabricated by immersing a Cu-coated COC film in the aniline polymerizing solution for 30 min. The Cu-coated COC film was fabricated by immersing a palladium-activated COC film in a Cu electroless plating bath at 40 °C for 10 min.



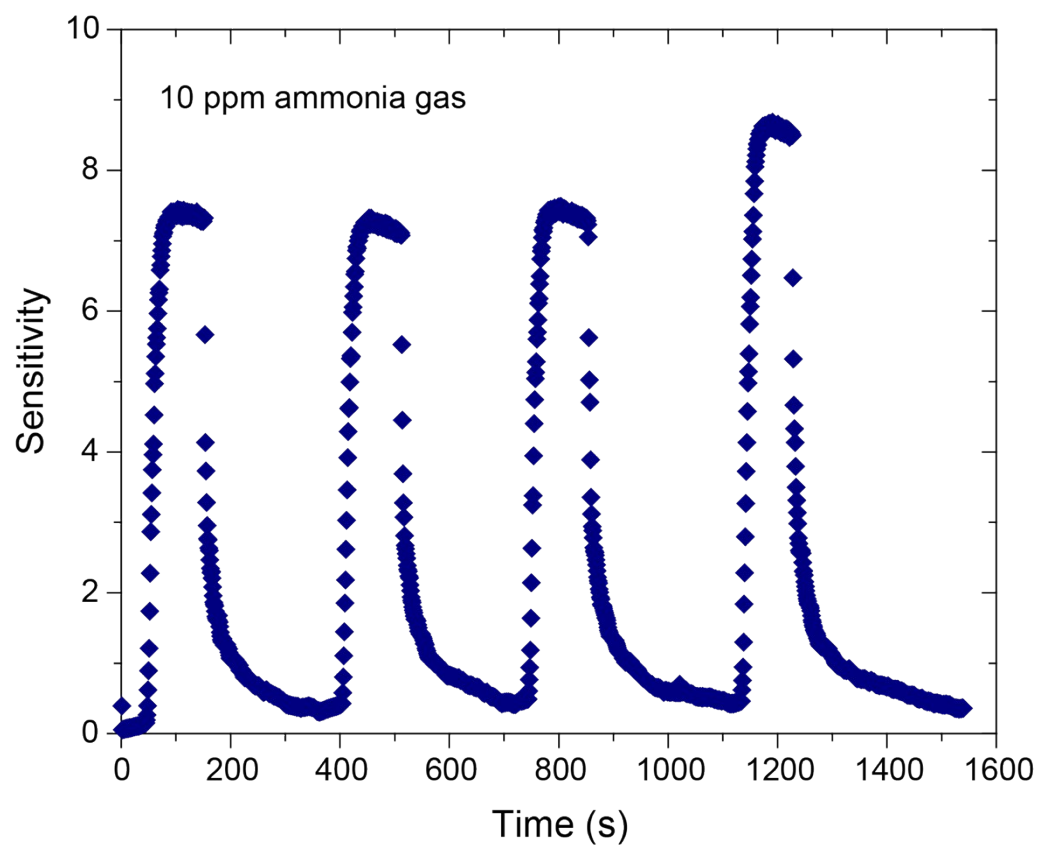

**Figure S8.** Sensing performance of the PANI mesh under exposure to ammonia gas of 10 ppm concentration for four consecutive cycles. The PANI mesh was generated from 20-min polymerization.

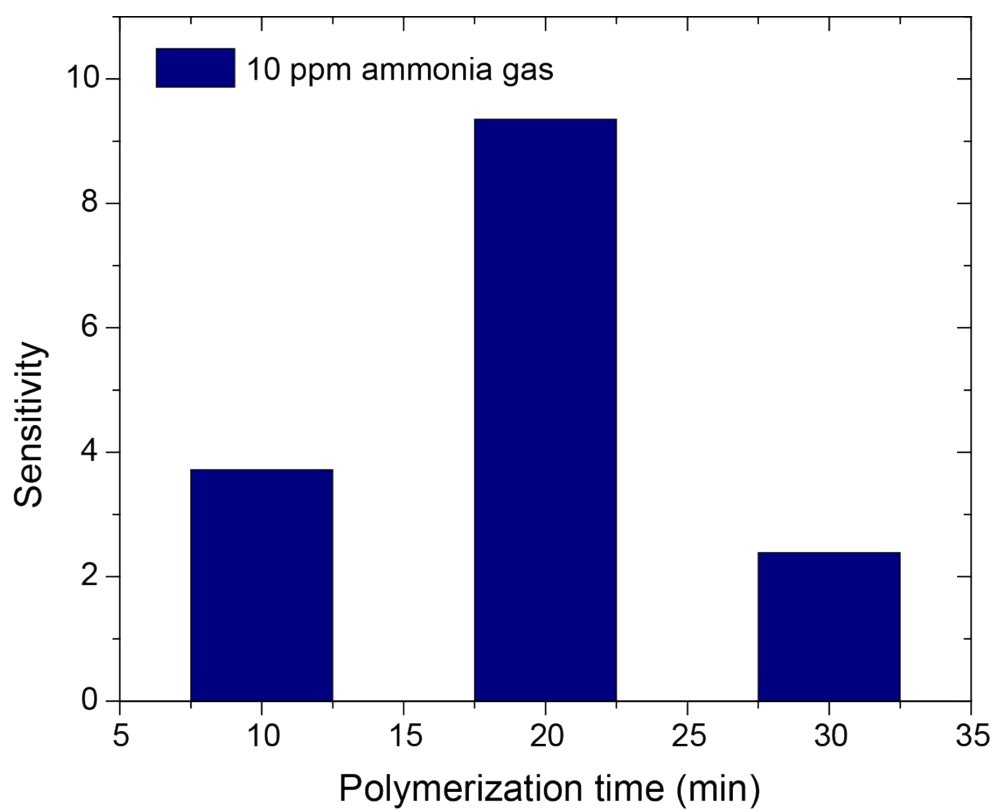

**Figure S9.** Sensing performance of the PANI mesh generated from various lengths of polymerization time under exposure to ammonia gas of 10 ppm.

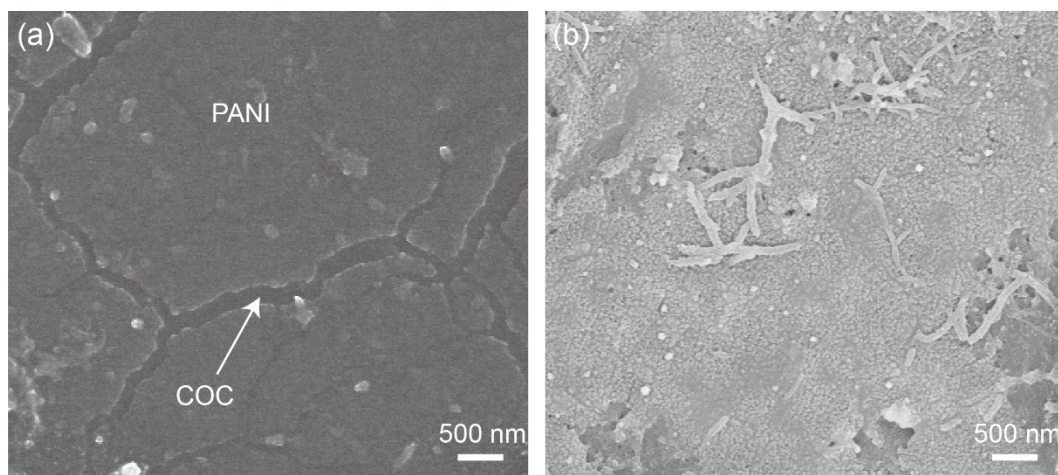

**Figure S10.** SEM micrographs of the PANI nanostructures on the PANI mesh after (a) 10 min, and (b) 30 min in the aniline polymerization solution.

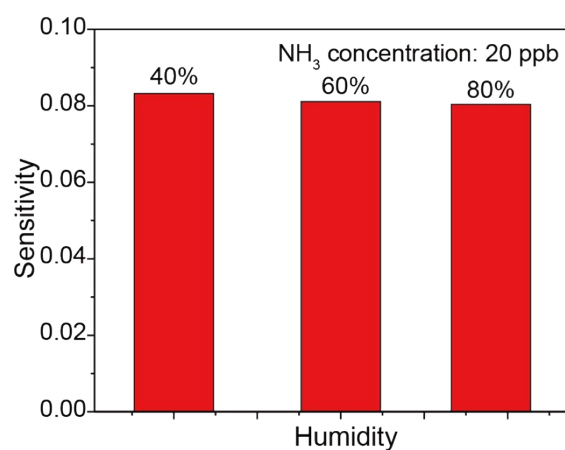

**Figure S11.** Sensing performance of the PANI mesh under exposure to ammonia gas of 20 ppb at different environmental relative humidity. The uncertainty of humidity was 5%.
